# Supplementary material for: Nature of ammonia storage sites in H-SSZ-13 and Cu-SSZ-13
Source: Royal Society of Chemistry journal article supplement (doi:10.1039/d6ra03025d), 2026-05-26
Supplement: d6ra03025d1.pdf [file d6ra03025d1.pdf]

## Supporting Information

### Nature of ammonia storage sites in H-SSZ-13 and Cu-SSZ-13

Ghodsieh Isapour<sup>a\*</sup>, Yingxin Feng<sup>b</sup>, Henrik Grönbeck<sup>b</sup>, Magnus Skoglundh<sup>a</sup> and Hanna Härelind<sup>a\*</sup>

Competence Centre for Catalysis, Chalmers University of Technology, Gothenburg, Sweden, , SE-41296, Gothenburg, Sweden

<sup>a</sup>Department of Chemistry and Chemical engineering, Division of Applied Chemistry

<sup>b</sup>Department of Physics, Division of Chemical Physics

### Available Supporting Information

Table S1. Si/Al ratio, Cu/Al ratio, specific surface area, and specific pore volume of the samples.

| Sample |       | Specific surface area (m <sup>2</sup> .g <sup>-1</sup> ) | Specific pore volume (cm <sup>3</sup> .g <sup>-1</sup> ) | Si/Al molar ratio | Cu/Al molar ratio |
|--------|-------|----------------------------------------------------------|----------------------------------------------------------|-------------------|-------------------|
| Si/Al  | Cu/Al |                                                          |                                                          |                   |                   |
| 6      | 0     | 603                                                      | 0.01                                                     | 4.8               | -                 |
| 6      | 0.1   | 486                                                      | 0.07                                                     | 4.6               | 0.11              |
| 6      | 0.2   | 499                                                      | 0.19                                                     | 4.6               | 0.18              |
| 6      | 0.3   | 475                                                      | 0.03                                                     | 5.1               | 0.33              |
| 6      | 0.4   | 482                                                      | 0.19                                                     | 5.7               | 0.43              |
| 12     | 0     | 650                                                      | 0.3                                                      | 12.6              | -                 |
| 12     | 0.1   | 670                                                      | 0.28                                                     | 12.6              | 0.1               |
| 12     | 0.2   | 659                                                      | 0.27                                                     | 13.5              | 0.22              |
| 12     | 0.3   | 649                                                      | 0.27                                                     | 14                | 0.33              |
| 12     | 0.4   | 631                                                      | 0.26                                                     | 14                | 0.36              |
| 24     | 0     | 613                                                      | 0.25                                                     | 25                | -                 |
| 24     | 0.1   | 613                                                      | 0.29                                                     | 22.2              | 0.08              |
| 24     | 0.2   | 638                                                      | 0.28                                                     | 25.4              | 0.19              |
| 24     | 0.3   | 644                                                      | 0.29                                                     | 26.12             | 0.25              |
| 24     | 0.4   | 699                                                      | 0.25                                                     | 24.5              | 0.4               |
